# Supplementary material for: Generation and Characterization of Ins1-cre-driver C57BL/6N for Exclusive Pancreatic Beta Cell-specific Cre-loxP Recombination
Source: PubMed Central journal article supplement — Exp Anim. 2014 Apr 26;63(2):183–91. doi: 10.1538/expanim.63.183 (PMC4160984; doi:10.1538/expanim.63.183), 2014-04-26
Supplement: expanim-63-183-s001.pdf [file expanim-63-183-s001.pdf]

**Wild-type *ROSA26* locus**

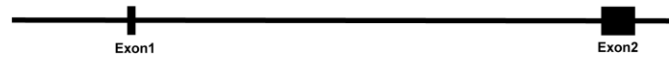

**R26R *ROSA26* locus**

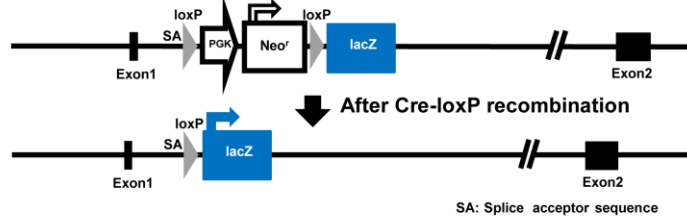

**R26GRR *ROSA26* locus**

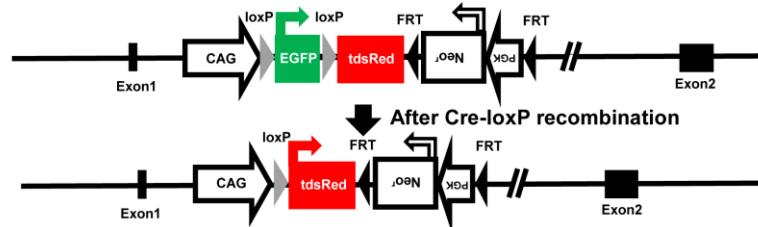

**Supplemental Fig. 1.** Comparison of reporter gene constructs in the *ROSA26* locus

between R26R and R26GRR mice.

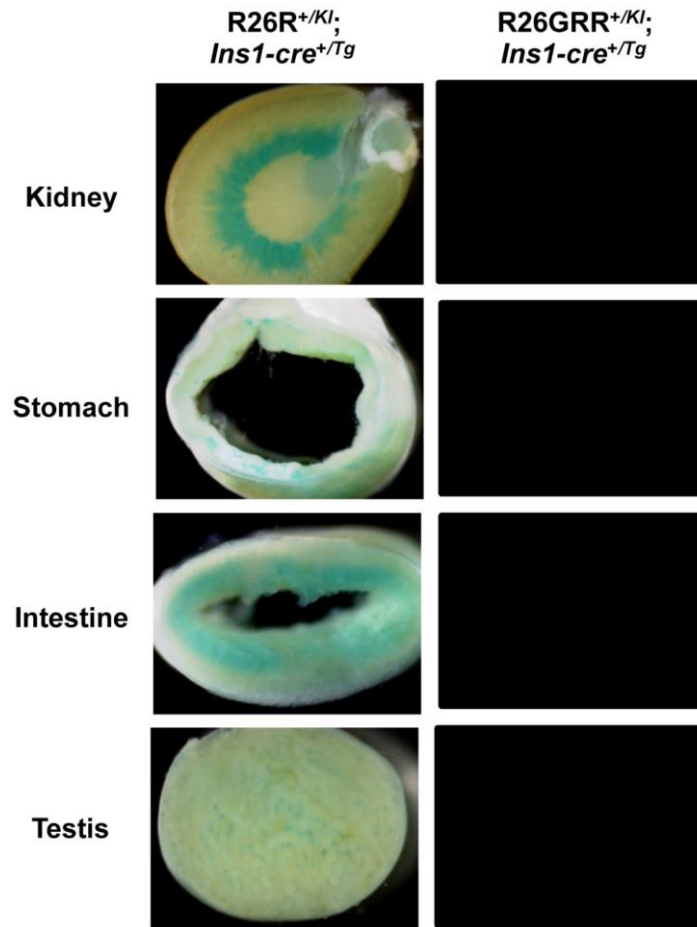

**Supplemental Fig. 2.** X-gal staining; adult R26R<sup>+KI</sup>; Ins1-cre<sup>+Tg</sup> and tdsRed fluorescence; adult R26GRR<sup>+KI</sup>; Ins1-cre<sup>+Tg</sup>. Each experiment ( $n = 6$ ).
